# Supplementary material
Source: bioRxiv or medRxiv preprint supplement (https://www.biorxiv.org/content/biorxiv/early/2019/03/06/569319.1/DC1/embed/media-1.pdf)
Supplement: Supplementary file [file media-1.pdf]

# Supplementary material to “Neonatal morphometric similarity mapping for predicting brain age and characterizing neuroanatomic variation associated with preterm birth”

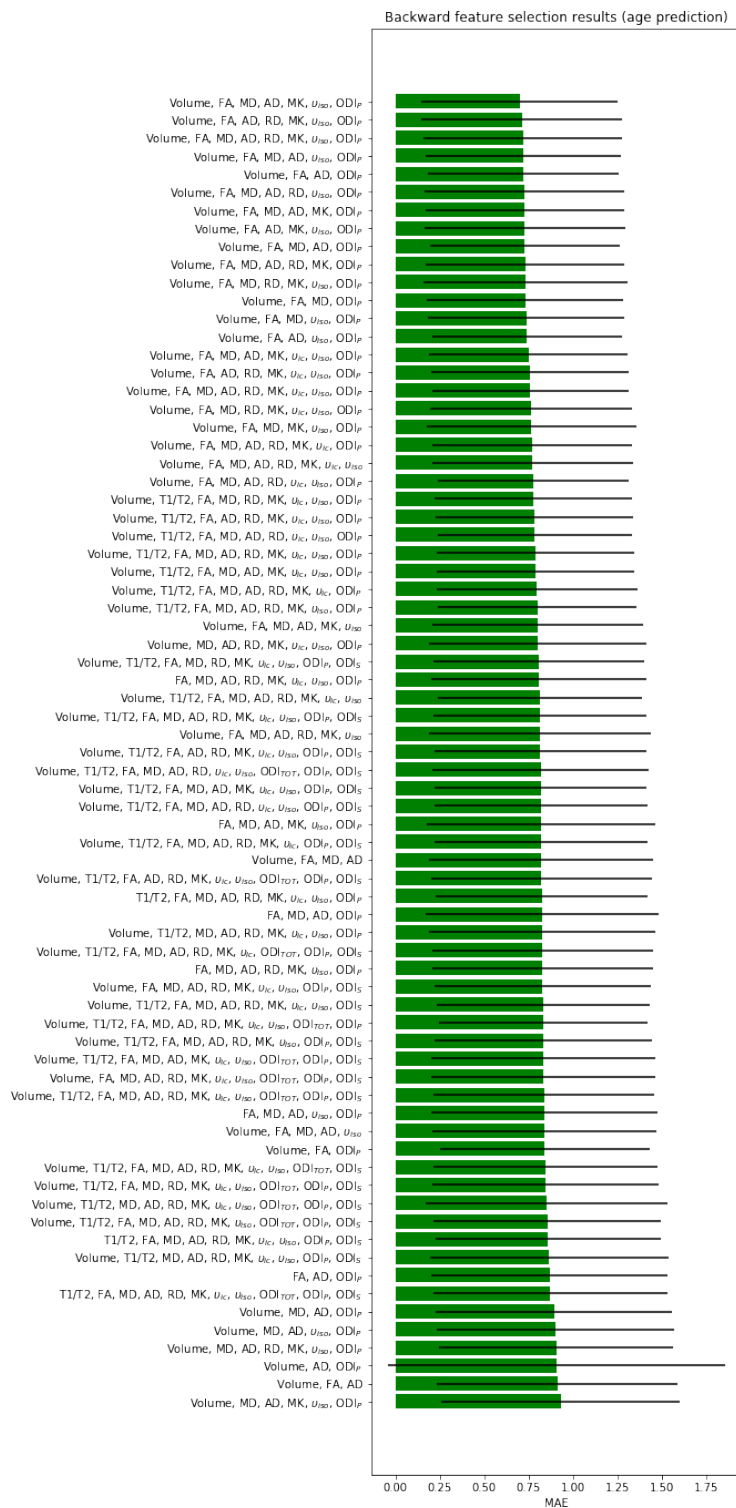

Figure 4-1 Feature selection results for the age prediction task. The best set of features was selected with a backward feature selection scheme: starting from the full set of features, at each iteration the feature whose subtraction caused the least increase in prediction error was removed. The mean absolute error (MAE) computed with leave-one-out cross-validation is reported for each subset of features. The black lines depict standard deviation.

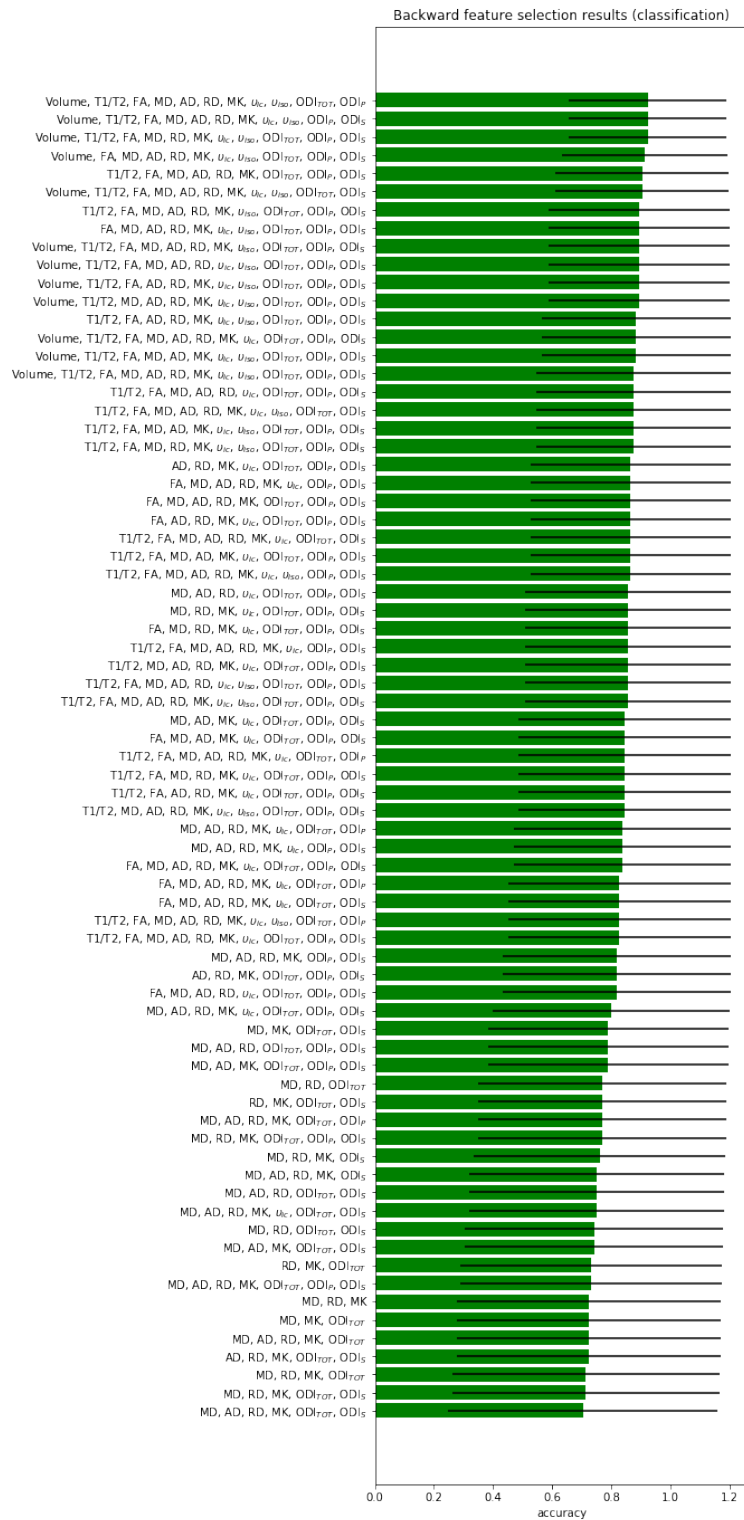

Figure 4-2 Feature selection results for the classification task. The best set of features was selected with a backward feature selection scheme: starting from the full set of features, at each iteration the feature whose subtraction caused the least decrease in prediction accuracy was removed. The accuracy computed with leave-one-out cross-validation is reported for each subset of features. The black lines depict standard deviation.

Table 5-1 Abbreviations of ROI names and division of ROIs into groups.

| Short name        | Long name                                                 | Group          |
|-------------------|-----------------------------------------------------------|----------------|
| Hip               | Hippocampus left                                          | hippocampus    |
| Hip               | Hippocampus right                                         | hippocampus    |
| Amyg              | Amygdala left                                             | amygdala       |
| Amyg              | Amygdala right                                            | amygdala       |
| ATempMed.GM       | Anterior temporal lobe                                    | cortical GM    |
| ATempMed.GM       | Anterior temporal lobe                                    | cortical GM    |
| ATempLat.GM       | Anterior temporal lobe                                    | cortical GM    |
| ATempLat.GM       | Anterior temporal lobe                                    | cortical GM    |
| ParaAmbAnt.GM     | Gyri parahippocampalis et ambiens anterior part left GM   | cortical GM    |
| ParaAmbAnt.GM     | Gyri parahippocampalis et ambiens anterior part right GM  | cortical GM    |
| STempMid.GM       | Superior temporal gyrus                                   | cortical GM    |
| STempMid.GM       | Superior temporal gyrus                                   | cortical GM    |
| MITempAnt.GM      | Medial and inferior temporal gyri anterior part left GM   | cortical GM    |
| MITempAnt.GM      | Medial and inferior temporal gyri anterior part right GM  | cortical GM    |
| OccTempFusiAnt.GM | Lateral occipitotemporal gyrus                            | cortical GM    |
| OccTempFusiAnt.GM | Lateral occipitotemporal gyrus                            | cortical GM    |
| Cereb             | Cerebellum left                                           | cerebellum     |
| Cereb             | Cerebellum right                                          | cerebellum     |
| BStem             | Brainstem                                                 | brain stem     |
| Insula.GM         | Insula right GM                                           | cortical GM    |
| Insula.GM         | Insula left GM                                            | cortical GM    |
| Occ.GM            | Occipital lobe right GM                                   | cortical GM    |
| Occ.GM            | Occipital lobe left GM                                    | cortical GM    |
| ParaAmbPos.GM     | Gyri parahippocampalis et ambiens posterior part right GM | cortical GM    |
| ParaAmbPos.GM     | Gyri parahippocampalis et ambiens posterior part left GM  | cortical GM    |
| OccTempFusiPos.GM | Lateral occipitotemporal gyrus                            | cortical GM    |
| OccTempFusiPos.GM | Lateral occipitotemporal gyrus                            | cortical GM    |
| MITempPos.GM      | Medial and inferior temporal gyri posterior part right GM | cortical GM    |
| MITempPos.GM      | Medial and inferior temporal gyri posterior part left GM  | cortical GM    |
| STempPos.GM       | Superior temporal gyrus                                   | cortical GM    |
| STempPos.GM       | Superior temporal gyrus                                   | cortical GM    |
| CingAnt.GM        | Cingulate gyrus                                           | cortical GM    |
| CingAnt.GM        | Cingulate gyrus                                           | cortical GM    |
| CingPos.GM        | Cingulate gyrus                                           | cortical GM    |
| CingPos.GM        | Cingulate gyrus                                           | cortical GM    |
| Front.GM          | Frontal lobe right GM                                     | cortical GM    |
| Front.GM          | Frontal lobe left GM                                      | cortical GM    |
| Pariet.GM         | Parietal lobe right GM                                    | cortical GM    |
| Pariet.GM         | Parietal lobe left GM                                     | cortical GM    |
| Caud              | Caudate nucleus right                                     | subcortical GM |
| Caud              | Caudate nucleus left                                      | subcortical GM |
| Thal.High         | Thalamus right                                            | subcortical GM |
| Thal.High         | Thalamus left                                             | subcortical GM |
| Subthal           | Subthalamic nucleus right                                 | subcortical GM |
| Subthal           | Subthalamic nucleus left                                  | subcortical GM |
| Lenti             | Lentiform Nucleus right                                   | subcortical GM |
| Lenti             | Lentiform Nucleus left                                    | subcortical GM |
| ATempMed.WM       | Anterior temporal lobe                                    | cortical GM    |
| ATempMed.WM       | Anterior temporal lobe                                    | cortical GM    |
| ATempLat.WM       | Anterior temporal lobe                                    | cortical GM    |
| ATempLat.WM       | Anterior temporal lobe                                    | cortical GM    |
| ParaAmbAnt.WM     | Gyri parahippocampalis et ambiens anterior part left WM   | WM             |
| ParaAmbAnt.WM     | Gyri parahippocampalis et ambiens anterior part right WM  | WM             |
| STempMid.WM       | Superior temporal gyrus                                   | WM             |
| STempMid.WM       | Superior temporal gyrus                                   | WM             |
| MITempAnt.WM      | Medial and inferior temporal gyri anterior part left WM   | WM             |
| MITempAnt.WM      | Medial and inferior temporal gyri anterior part right WM  | WM             |
| OccTempFusiAnt.WM | Lateral occipitotemporal gyrus                            | WM             |

|                   |                                                           |                |
|-------------------|-----------------------------------------------------------|----------------|
| OccTempFusiAnt.WM | Lateral occipitotemporal gyrus                            | WM             |
| Insula.WM         | Insula right WM                                           | WM             |
| Insula.WM         | Insula left WM                                            | WM             |
| Occ.WM            | Occipital lobe right WM                                   | WM             |
| Occ.WM            | Occipital lobe left WM                                    | WM             |
| ParaAmbPos.WM     | Gyri parahippocampalis et ambiens posterior part right WM | WM             |
| ParaAmbPos.WM     | Gyri parahippocampalis et ambiens posterior part left WM  | WM             |
| OccTempFusiPos.WM | Lateral occipitotemporal gyrus                            | WM             |
| OccTempFusiPos.WM | Lateral occipitotemporal gyrus                            | WM             |
| MITempPos.WM      | Medial and inferior temporal gyri posterior part right WM | WM             |
| MITempPos.WM      | Medial and inferior temporal gyri posterior part left WM  | WM             |
| STempPos.WM       | Superior temporal gyrus                                   | WM             |
| STempPos.WM       | Superior temporal gyrus                                   | WM             |
| CingAnt.WM        | Cingulate gyrus                                           | WM             |
| CingAnt.WM        | Cingulate gyrus                                           | WM             |
| CingPos.WM        | Cingulate gyrus                                           | WM             |
| CingPos.WM        | Cingulate gyrus                                           | WM             |
| Front.WM          | Frontal lobe right WM                                     | WM             |
| Front.WM          | Frontal lobe left WM                                      | WM             |
| Pariet.WM         | Parietal lobe right WM                                    | WM             |
| Pariet.WM         | Parietal lobe left WM                                     | WM             |
| Thal.Low          | Thalamus right                                            | subcortical GM |
| Thal.Low          | Thalamus left                                             | subcortical GM |

*GM = gray matter, WM = white matter.*
